# Supplementary material for: The Entamoeba histolytica Vps26 (EhVps26) retromeric protein is involved in phagocytosis: Bioinformatic and experimental approaches
Source: PubMed Central journal article supplement (PMC11309391; doi:10.1371/journal.pone.0304842), 2024-08-08

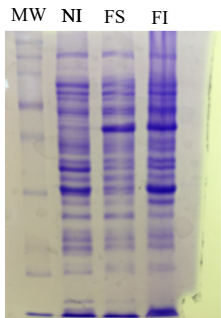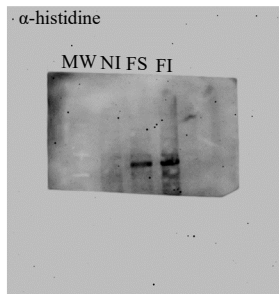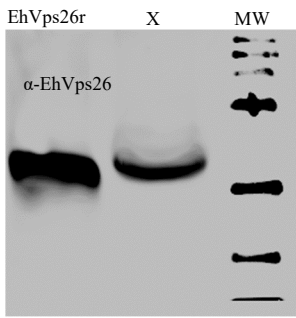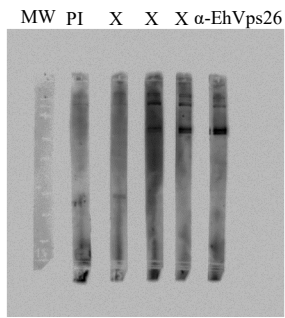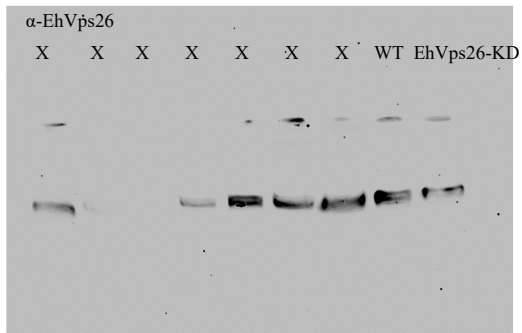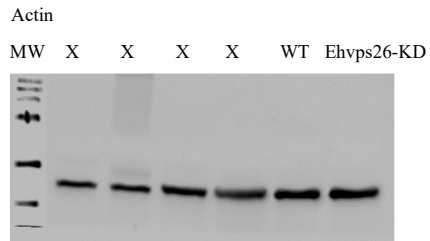

Supplement: pone.0304842.s004.pdf [file pone.0304842.s004.pdf]
